# Supplementary material
Source: publisher figshare collection journal article supplement (https://gsapubs.figshare.com/articles/dataset/_/12540230)
Supplement: Supplementary file 1 [file 1]

## U-Pb dating of calcite veins reveals complex stress evolution and thrust sequence in the Bighorn Basin, USA.

Nicolas Beaudoin<sup>1,\*</sup>, Olivier Lacombe<sup>2</sup>, Nick M W Roberts<sup>3</sup>, Daniel Koehn<sup>4</sup>

*1: Laboratoire des Fluides Complexes et leurs Réservoirs-IPRA, E2S-UPPA, Total, CNRS, Université de Pau et des Pays de l'Adour, UMR5150, Pau, France*

*2: Sorbonne Université, CNRS-INSU, Institut des Sciences de la Terre de Paris, IStEP UMR 7193, F-75005, Paris, France*

*3: NERC Isotope Geosciences Laboratory, British Geological Survey, Keyworth NG12 5GG, UK*

*4: School of Geographical and Earth Sciences, University of Glasgow, Gregory, Building, Lilybank Gardens, G12 8QQ Glasgow, UK*

### **Supplementary Information**

#### **U-Pb Geochronology:**

U-Pb geochronology via the in-situ Laser Ablation Inductively Coupled Mass Spectrometer (LA-ICP-MS) method was conducted at the Geochronology & Tracers Facility, NERC Isotope Geosciences Laboratory (Nottingham, UK). The method utilises a New Wave Research 193UC excimer laser ablation system, coupled to a Nu Instruments Attom single-collector sector-field ICP-MS. The method for calcite (Li et al., 2014; Coogan et al., 2016; Roberts & Walker, 2016; Roberts et al., 2017) is adapted from that used for zircon (see Spencer et al., 2014), with some modifications.

The laser parameters used are a 100µm static spot, fired at 10Hz, with a ~7-8 j.cm<sup>2</sup> fluence, for 30 seconds of ablation. Material is pre-ablated to clean the sample site with 150µm spots for 3 seconds. Normalisation uses standard sample bracketing to NIST 614 glass (Woodhead & Hergt, 2007) for Pb-Pb ratios, and a carbonate reference material developed in-house for <sup>206</sup>Pb/<sup>238</sup>U ratios (WC-1; Roberts et al., 2017). Normalisation is based on the measured/accepted ratio derived from the session-based drift-corrected mean of the primary WC-1 reference material. No common lead correction is made; those ages that are deemed robust (based on low MSWD), are determined from lower intercepts on a Tera-Wasserburg plot. All regressions are unanchored as the spread in data permits assessment of the upper intercept accurately. Age results are based in lower intercept ages with systematic uncertainties (decay constants, reference material age uncertainty, long-term method reproducibility) propagated. Resulting Tera-Wasserburg plots (semi-total Pb plots)

are shown below (Figure S2a-e), and have uncertainties quoted as age  $\pm$  x/y, where x is without systematic uncertainties and y is with (see Horstwood et al., 2016).

The reproducibility of the primary WC-1 reference material is around 2-4% per session. An estimate of the session reproducibility is propagated (as excess variance) onto the sample data. The ages quoted have additional systematic uncertainties propagated onto the final age, these include decay constant uncertainties, the laboratory-based long-term reproducibility of the method (~2%) and the uncertainty on the reference material age (~2.75%; based on in-house isotope dilution measurements).

An additional carbonate material, Duff Brown, was measured in most sessions to provide a control on accuracy and precision. An isotope dilution age of 64.04  $\pm$  0.67 Ma is provided by Hill et al. (2014). In each session the resulting age of Duff Brown was within uncertainty of this value (Figure S1C). The pooled data from all sessions yield an age of 63.25  $\pm$  0.86 Ma (2s without systematic uncertainties propagated; Figure S1D).

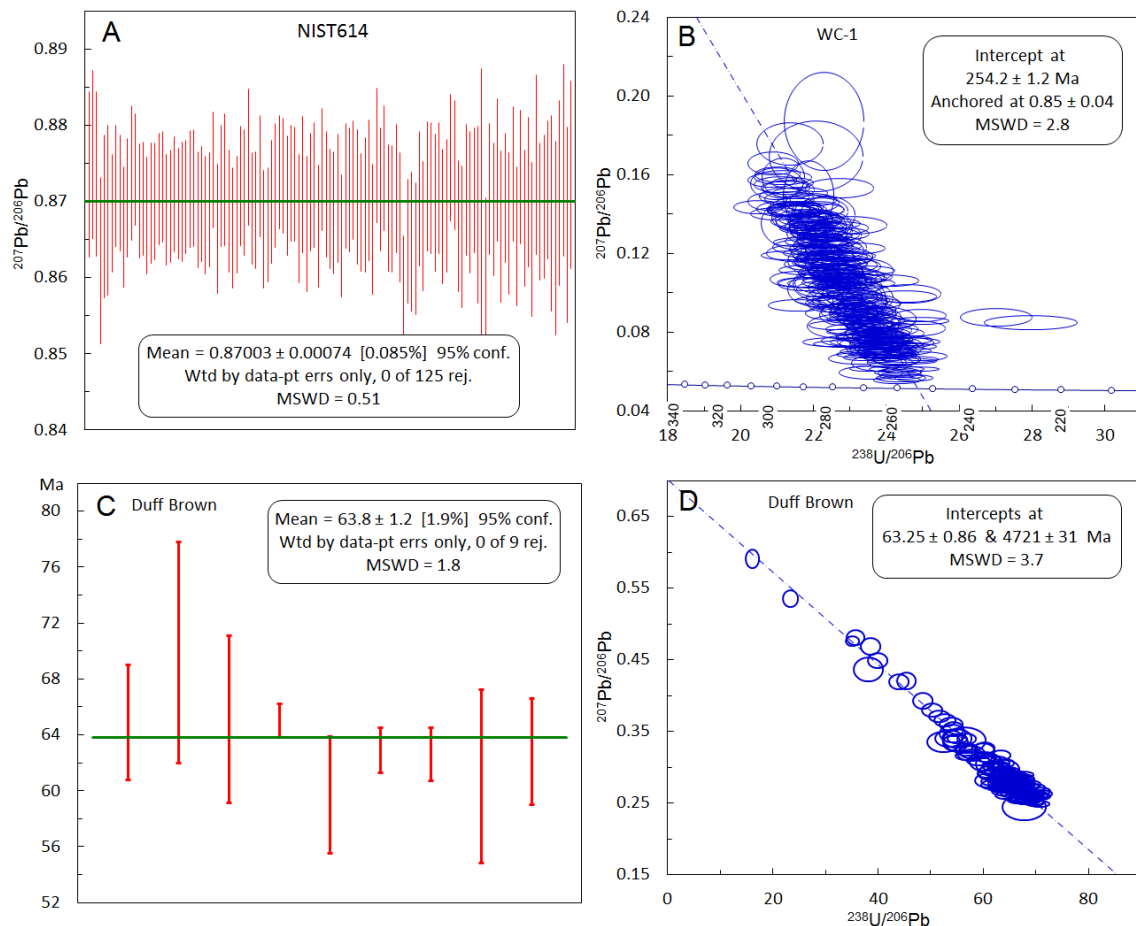

**Figure S1. A) Pooled NIST614  $^{207}\text{Pb}/^{206}\text{Pb}$  measurements for all sessions. B) Pooled WC-1 measurements (Tera-Wasserburg plot) for all sessions. C) Lower intercept (Tera-Wasserburg) age for Duff Brown for nine sessions. D) Pooled Tera-Wasserburg results for Duff-Brown (the same nine sessions).**

**Analytical Conditions:**

| <b>Laboratory &amp; Sample Preparation</b>         |                                                                                                                                |
|----------------------------------------------------|--------------------------------------------------------------------------------------------------------------------------------|
| Laboratory name                                    | NERC Isotope Geosciences Laboratory                                                                                            |
| Sample type/mineral                                | Calcite                                                                                                                        |
| Sample preparation                                 | In-situ in polished block                                                                                                      |
| Imaging                                            | None                                                                                                                           |
| <b>Laser ablation system</b>                       |                                                                                                                                |
| Make, Model & type                                 | ESI/New Wave Research, 193UC                                                                                                   |
| Ablation cell & volume                             | NWR TV2                                                                                                                        |
| Laser wavelength (nm)                              | 193nm                                                                                                                          |
| Pulse width (ns)                                   | 3-4ns                                                                                                                          |
| Fluence ( $\text{J}\cdot\text{cm}^{-2}$ )          | $\sim 7\text{-}8\text{ J}\cdot\text{cm}^{-2}$                                                                                  |
| Repetition rate (Hz)                               | 10Hz                                                                                                                           |
| Ablation duration (secs)                           | 30secs                                                                                                                         |
| Ablation pit depth / ablation rate                 | $\sim 45\mu\text{m}$ pit depth, measured using an optical microscope                                                           |
| Spot size ( $\mu\text{m}$ )                        | 100 $\mu\text{m}$                                                                                                              |
| Sampling mode / pattern                            | Static spot ablation                                                                                                           |
| Carrier gas                                        | 100% He, Ar make-up gas combined ca.50% along sample line.                                                                     |
| Cell carrier gas flow (l/min)                      | 0.6l/min                                                                                                                       |
| <b>ICP-MS Instrument</b>                           |                                                                                                                                |
| Make, Model & type                                 | Nu Instruments Attom SC-SF-ICP-MS                                                                                              |
| Sample introduction                                | Free air aspiration of desolvator                                                                                              |
| RF power (W)                                       | 1300W                                                                                                                          |
| Make-up gas flow (l/min)                           | 0.8l/min Ar                                                                                                                    |
| Detection system                                   | Discrete dynode MassCom ion counter                                                                                            |
| Masses measured                                    | 202, 204, 206, 207, 208, 232, 238                                                                                              |
| Integration time per peak                          | 200 $\mu\text{s}$ (202, 204, 208, 232), 400 $\mu\text{s}$ (206), 1000 $\mu\text{s}$ (207, 238)<br>80 sweeps per integration    |
| Total integration time per reading (secs)          | 0.30 seconds                                                                                                                   |
| Sensitivity / Efficiency (% , element)             | $\sim 0.2\%$ for Uranium                                                                                                       |
| IC Dead time (ns)                                  | 15ns                                                                                                                           |
| <b>Data Processing</b>                             |                                                                                                                                |
| Gas blank                                          | 60 second on-peak zero subtracted                                                                                              |
| Calibration strategy                               | NIST614 for Pb-Pb, WC-1 for Pb-U                                                                                               |
| Reference Material info                            | Primary: WC-1 254 $\pm$ 6 Ma (2s) - Roberts et al., 2017<br>Secondary: Duff Brown 64.04 $\pm$ 0.67 Ma (2s) - Hill et al., 2016 |
| Data processing package used / Correction for LIEF | Nu Instruments TRA acquisition software, in-house spreadsheet data processing                                                  |

|                                                   |                                                                                                                                  |
|---------------------------------------------------|----------------------------------------------------------------------------------------------------------------------------------|
| Mass discrimination                               | $^{207}\text{Pb}/^{206}\text{Pb}$ , $^{206}\text{Pb}/^{238}\text{U}$ normalised to reference materials                           |
| Common-Pb correction, composition and uncertainty | Unanchored (model 1) regressions in Tera-Wasserburg (Semi Total-Pb) plots.                                                       |
| Uncertainty level & propagation                   | Ages in the data table are quoted at 2s absolute and include systematic uncertainties, propagation is by quadratic addition.     |
| Quality control / Validation                      | Duff Brown over the course of the analytical sessions gave $63.25 \pm 0.86$ Ma (without propagation of systematic uncertainties) |
| <b>Other information</b>                          |                                                                                                                                  |

### Results:

Resulting ages and upper intercepts are quoted in addition to the plots below in Table DR1.

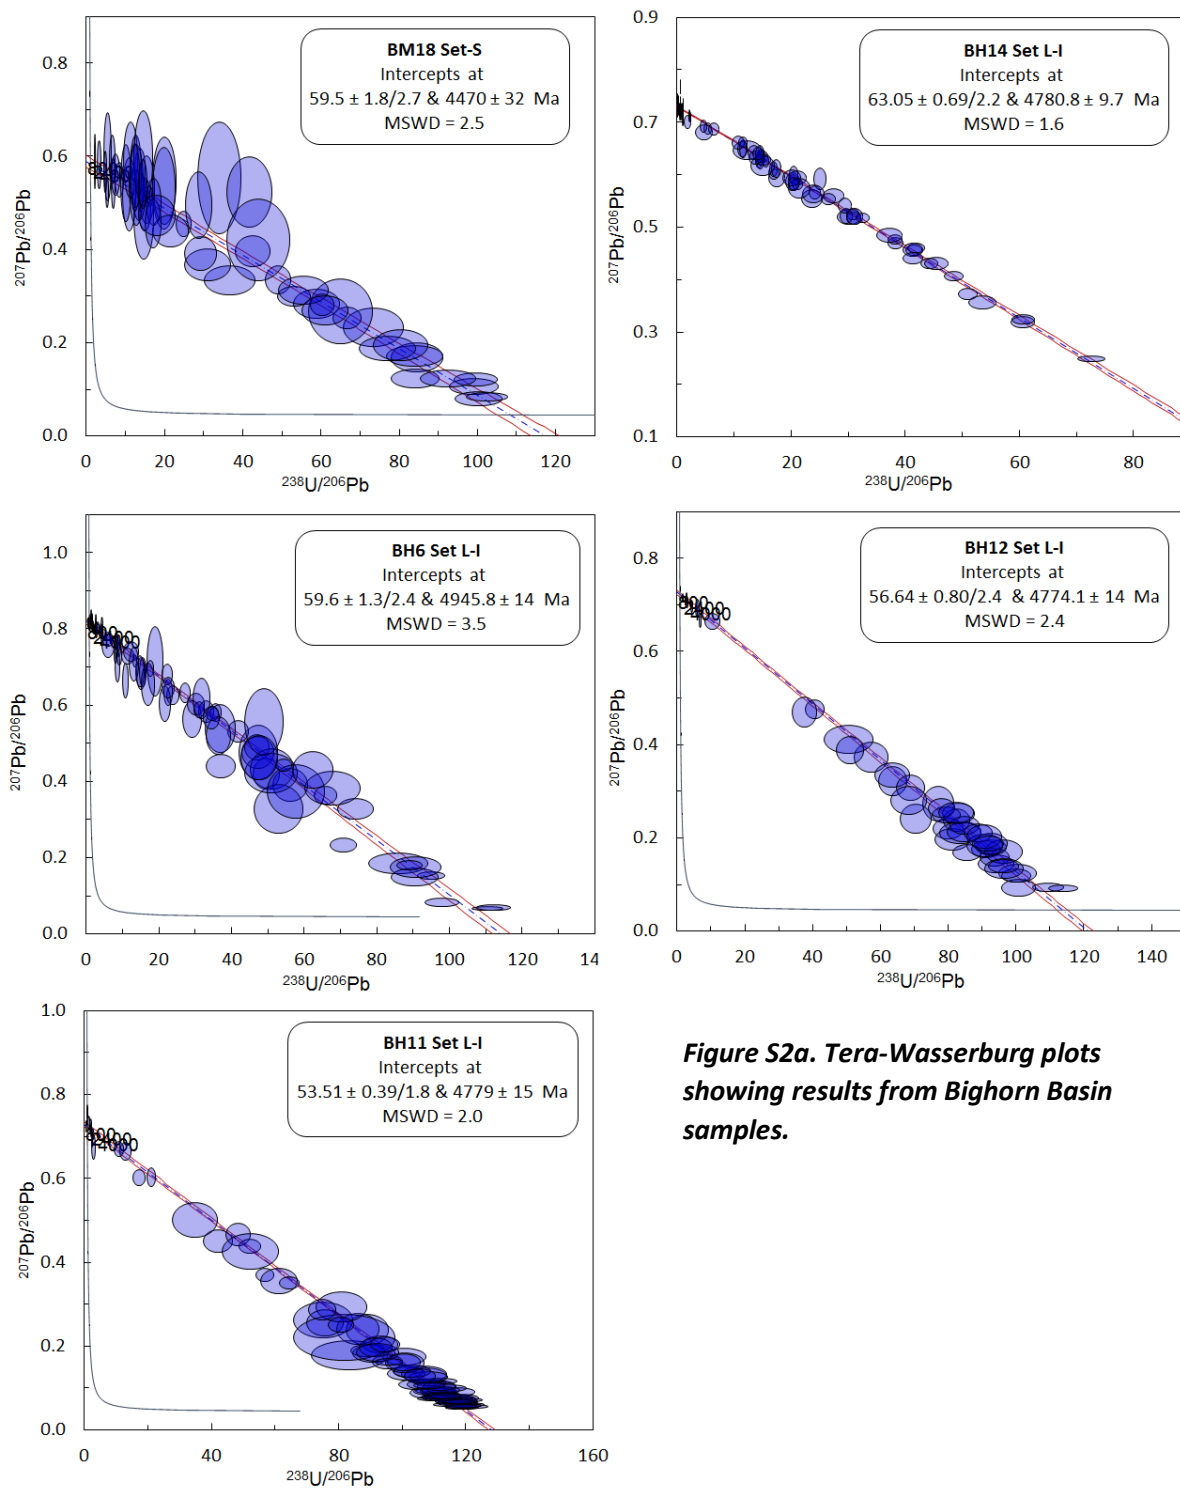

**Figure S2a. Tera-Wasserburg plots showing results from Bighorn Basin samples.**

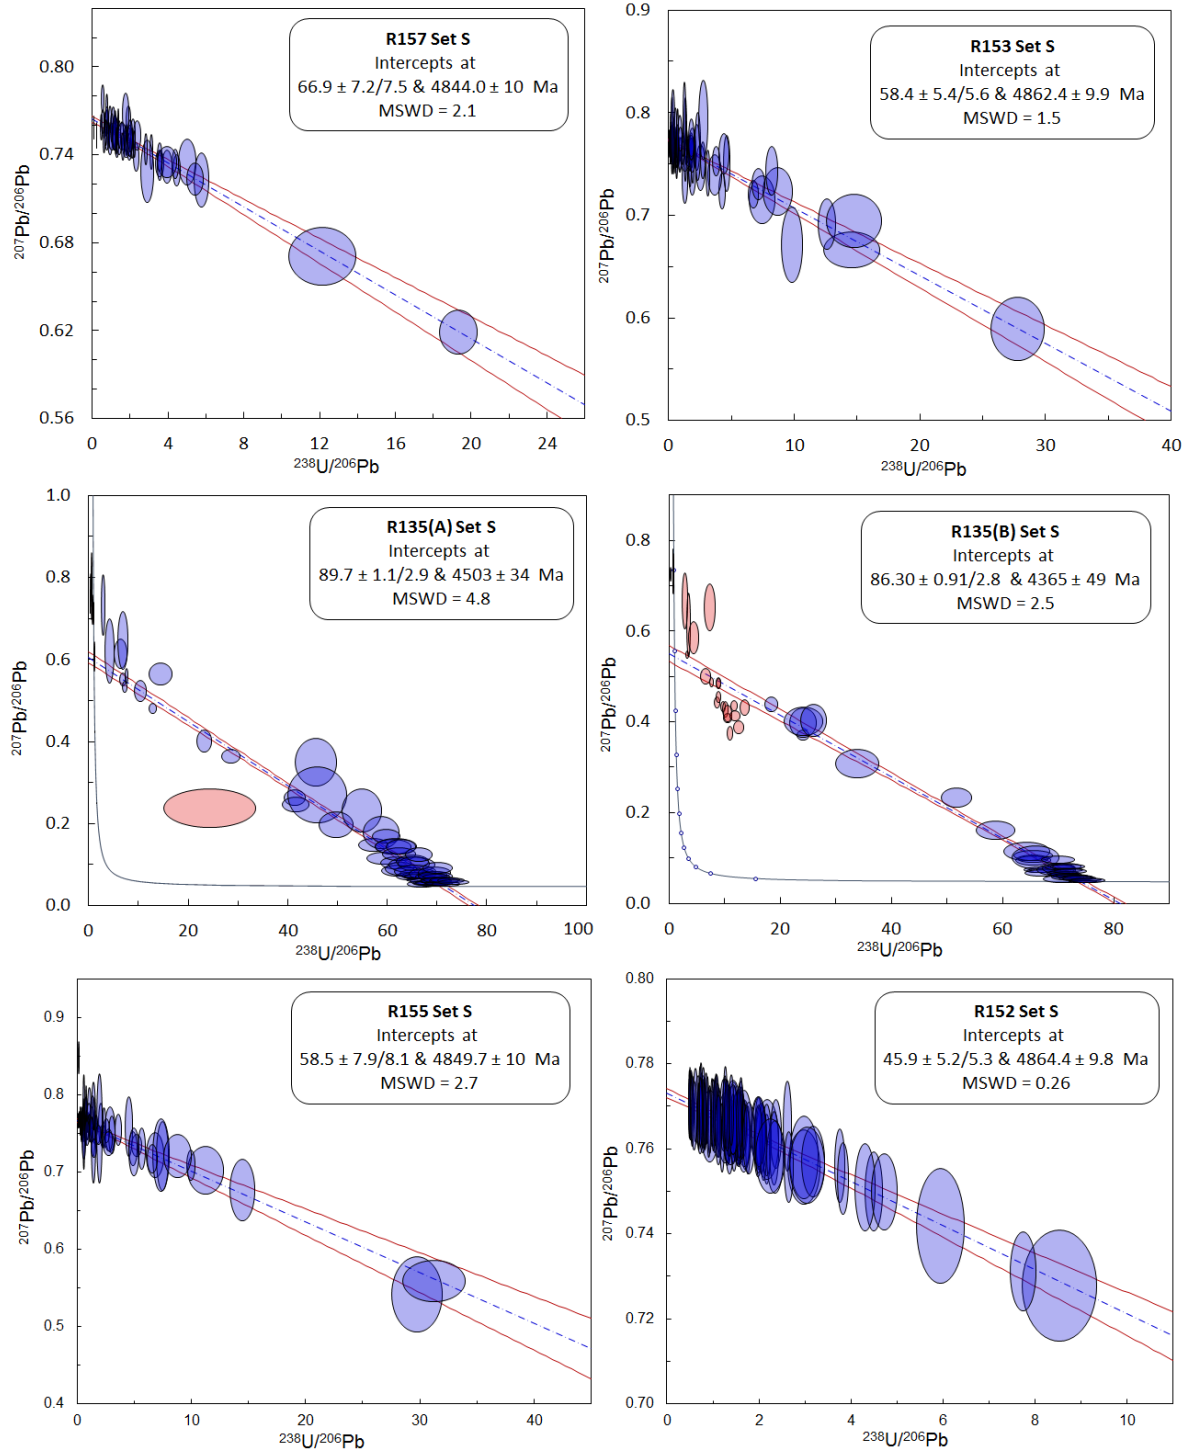

**Figure S2b. Tera-Wasserburg plots showing results from Rattlesnake samples.**

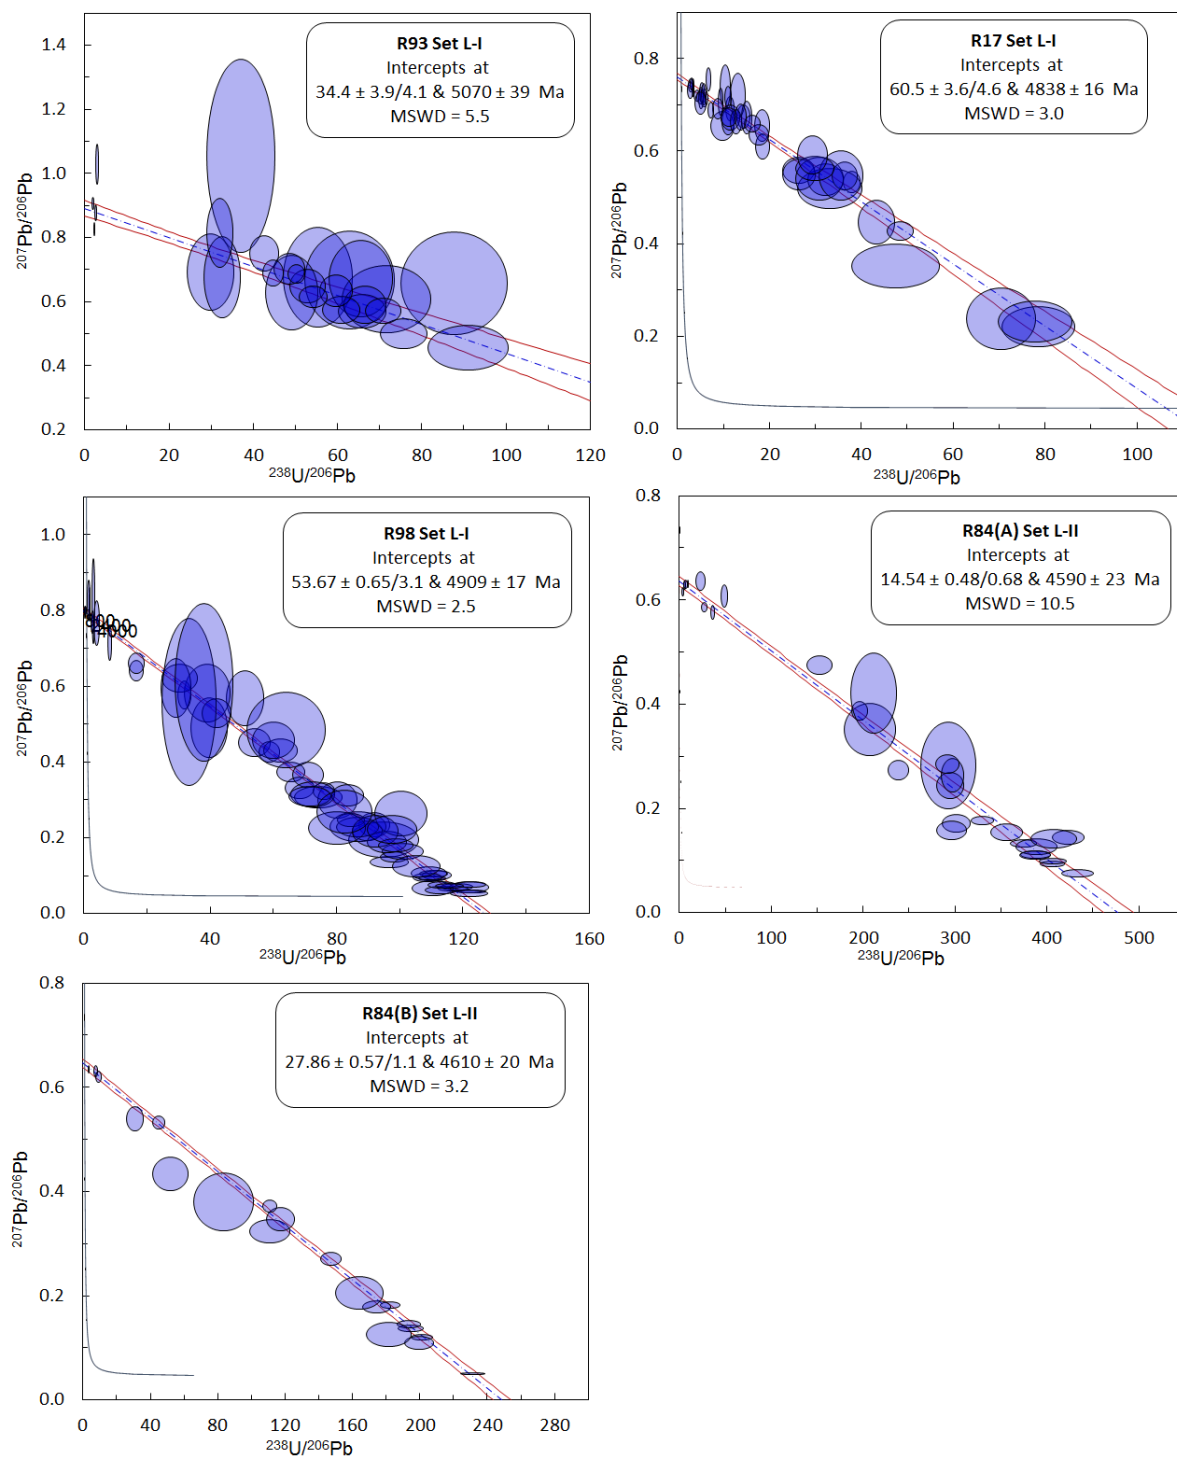

**Figure S2c. Tera-Wasserburg plots showing results from Rattlesnake samples (continued).**

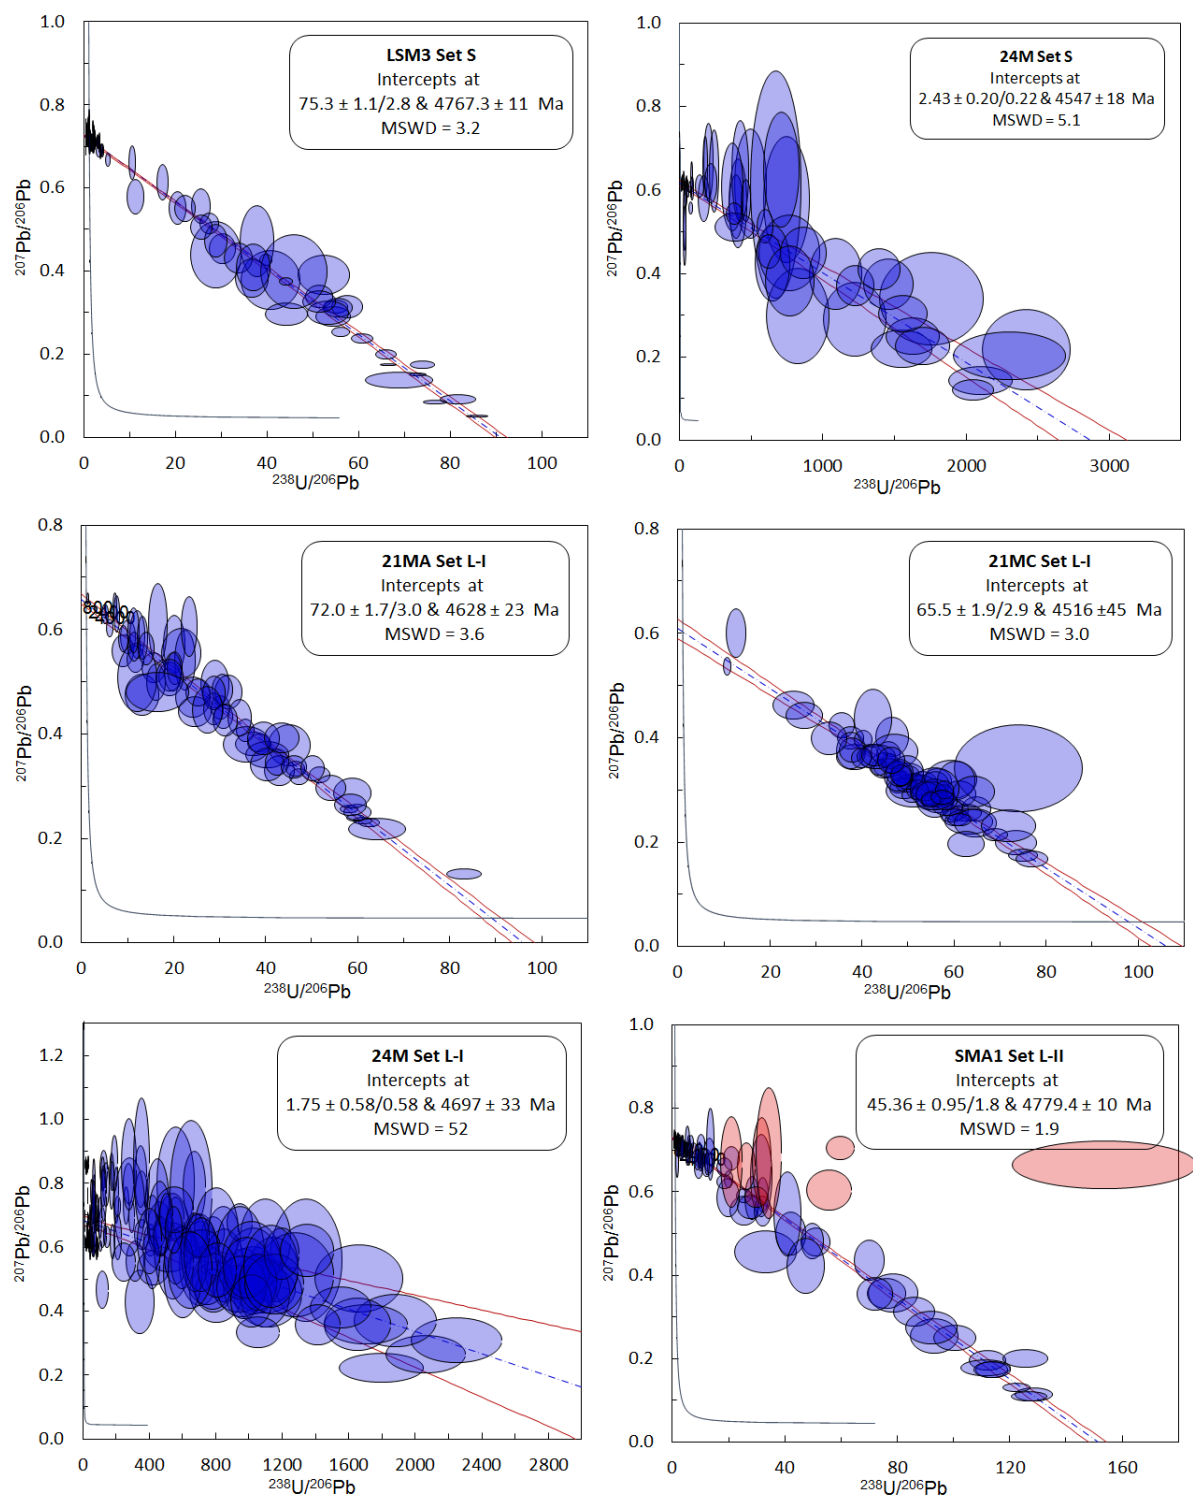

**Figure S2d. Tera-Wasserburg plots showing results from Little Sheep Mountain and Sheep Mountain Anticlines.**



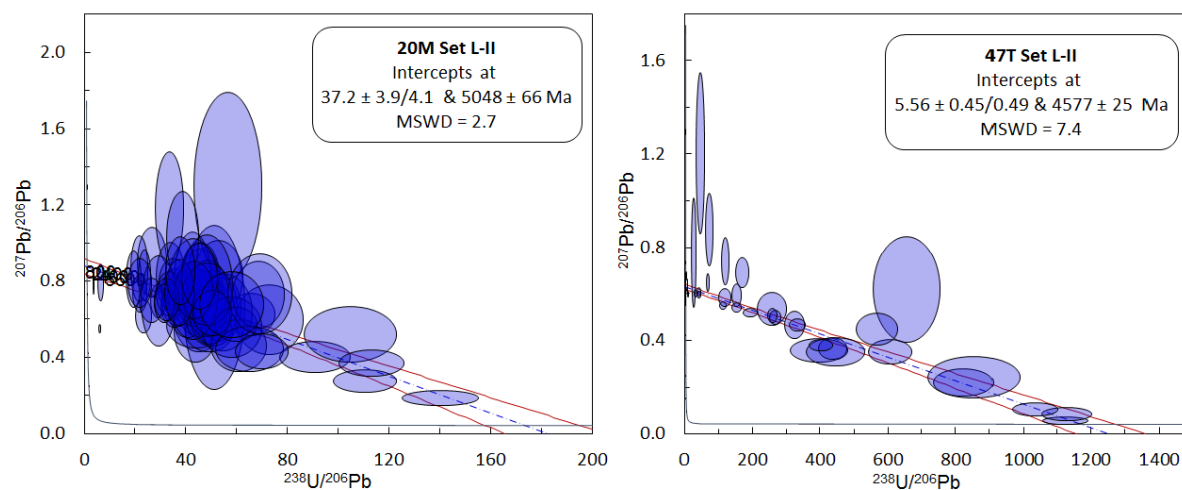

**Figure S2e. Tera-Wasserburg plots showing results from Little Sheep Mountain and Sheep Mountain Anticlines (continued).**

**Sample Images:**

| Sample name             | Set | Sample                                                                               |
|-------------------------|-----|--------------------------------------------------------------------------------------|
| <b>Bighorn Mountain</b> |     |                                                                                      |
| BM18                    | S   | 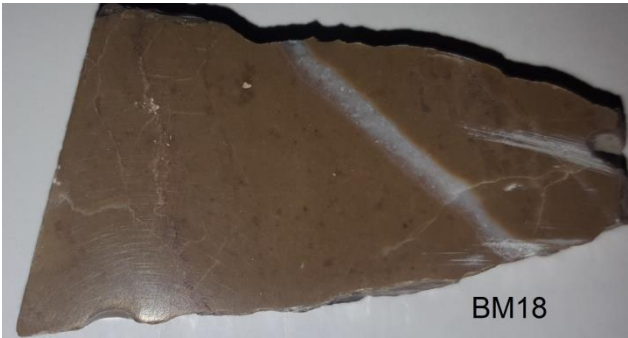 |
| BH14                    | L-I |  |

BH6

L-I

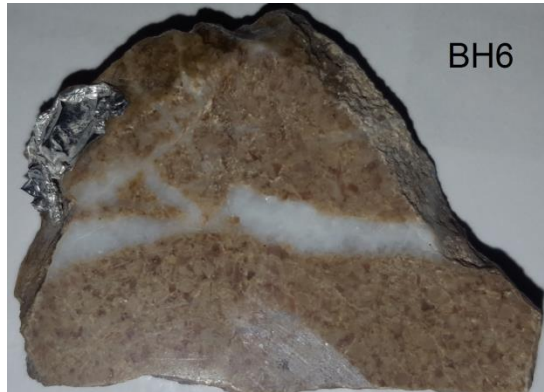

BH12

L-I

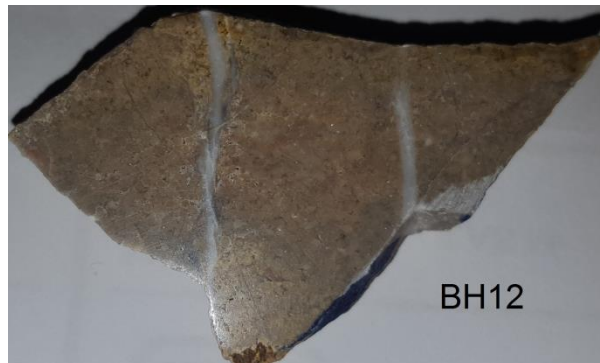

BH11

L-I

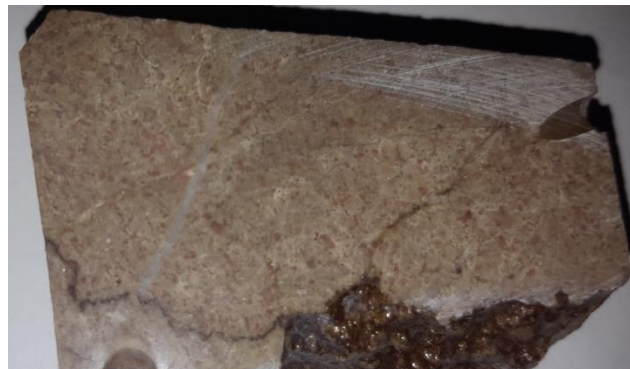

**Rattlesnake Mountain**

R157

S

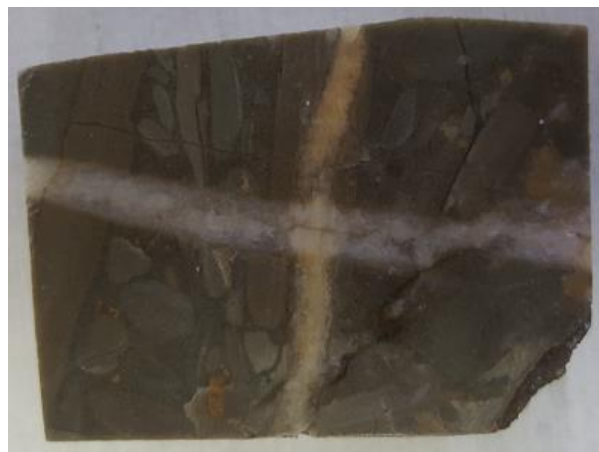

R153

S

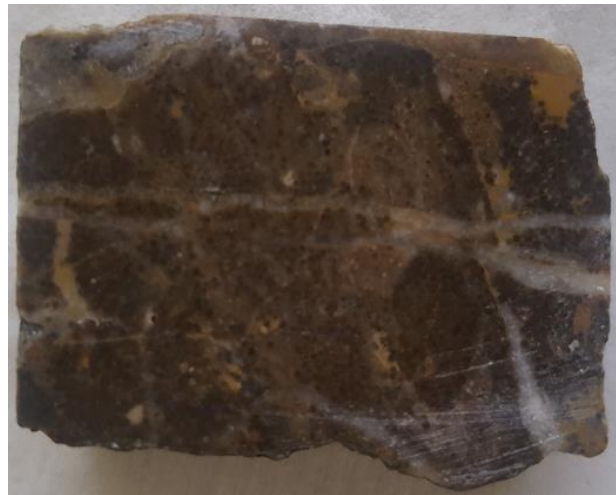

R135A

S

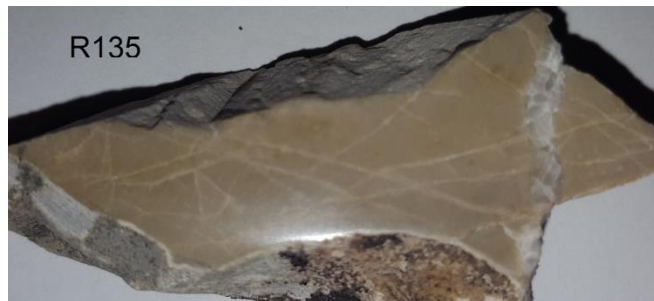

R135B

S

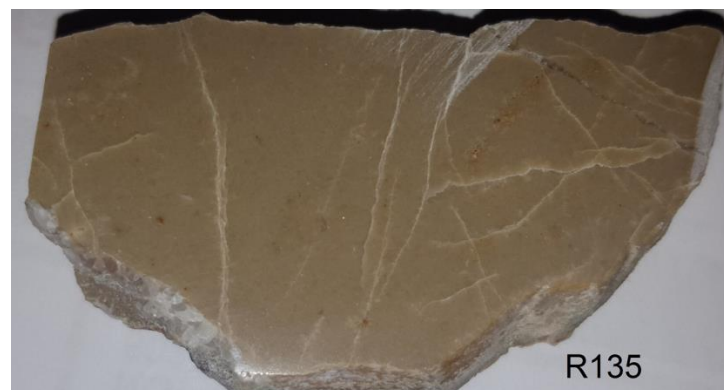

R155

S

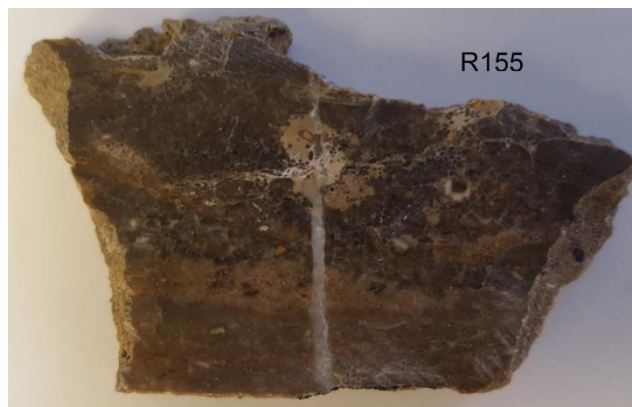

R152

S

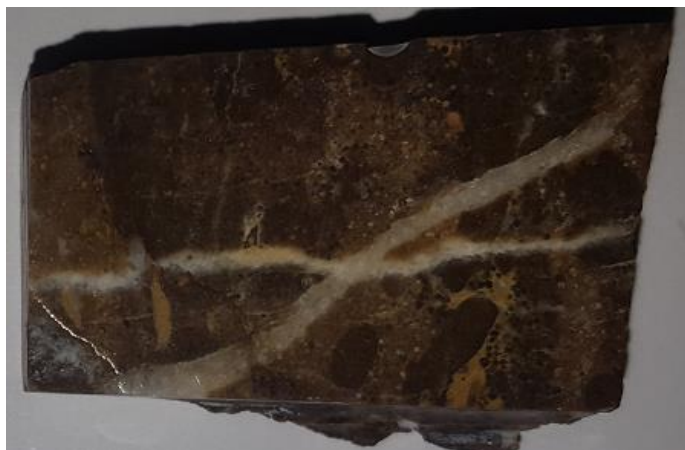

R93

L-I

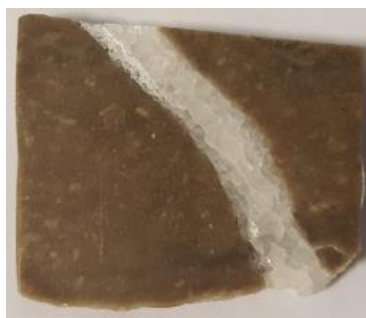

R17

L-I

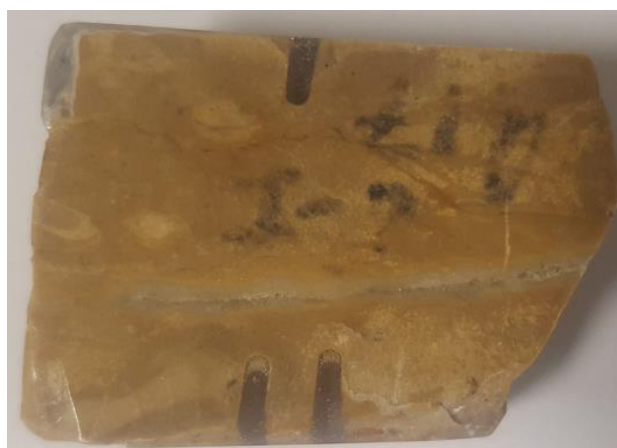

R98

L-I

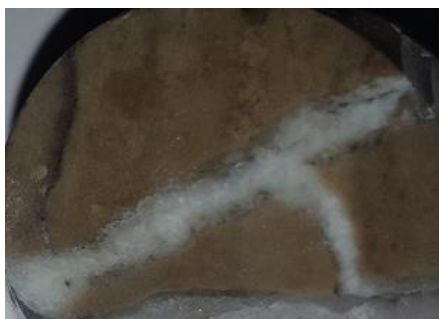

R84(B)

L-II

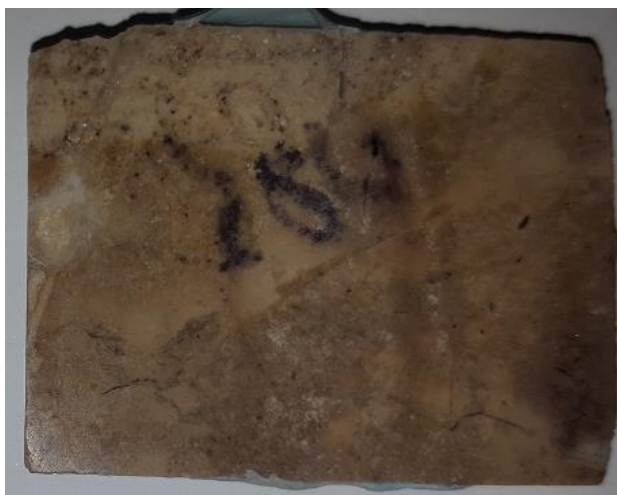

R84(a)

L-II

as above

**Little Sheep Mountain and  
Sheep Mountain  
Anticlines**

LSM3

S

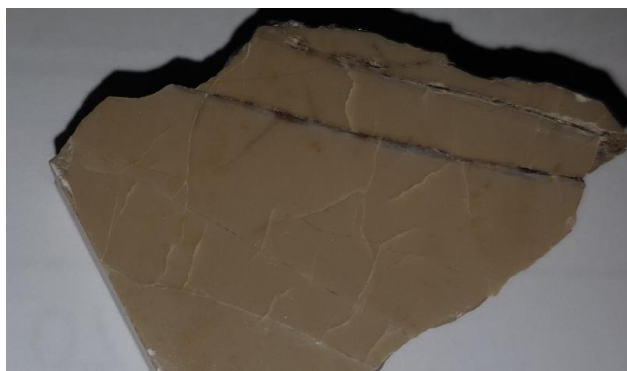

24M

S

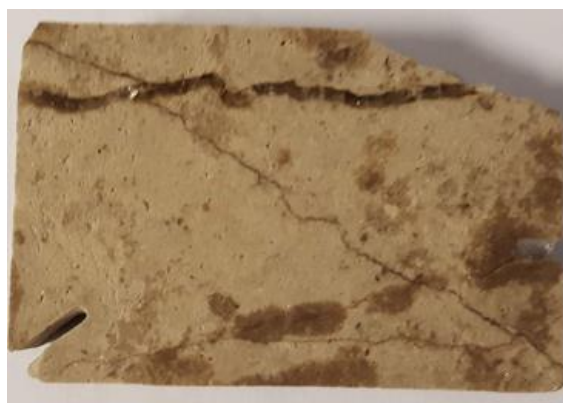



21M A

L-I

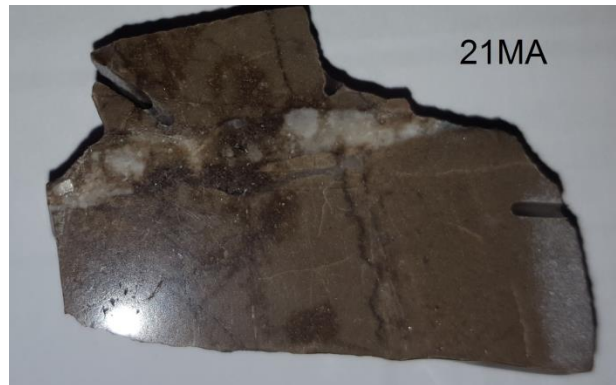

21M C

L-I

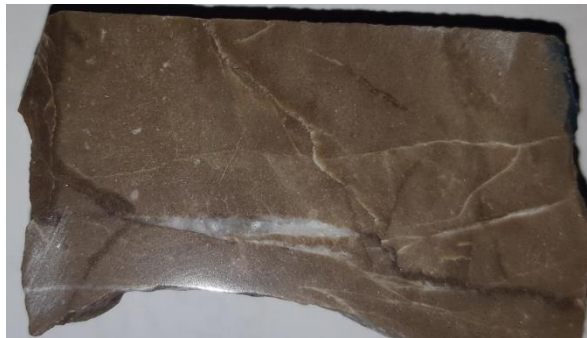

24M B

L-I

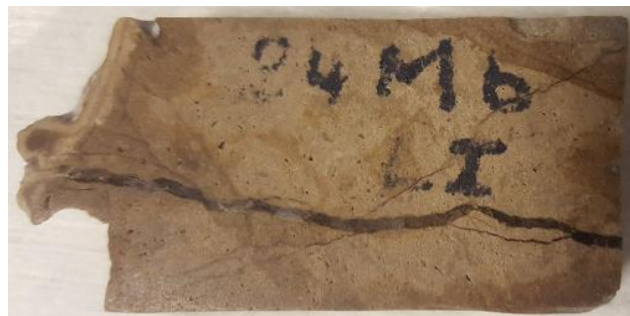

SMA1

L-II

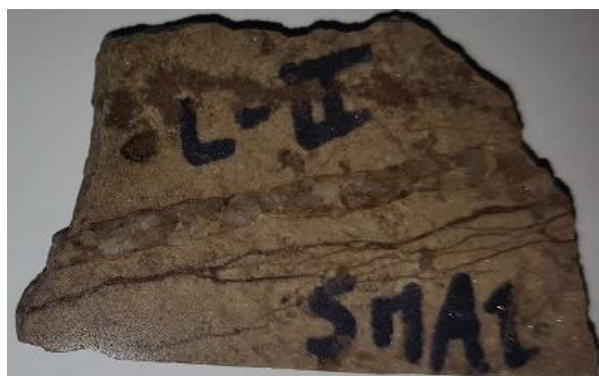

20M

L-II

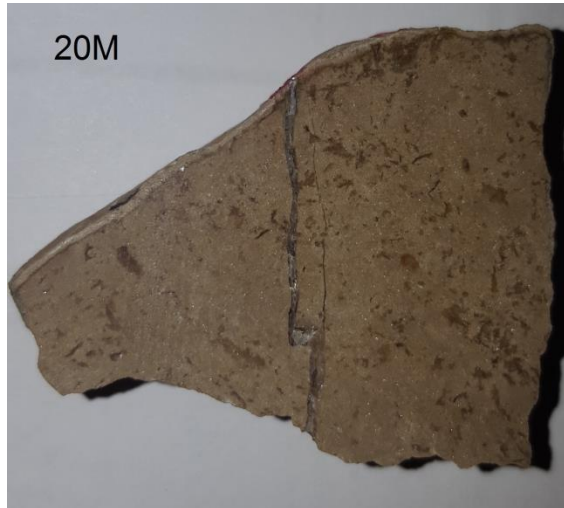

47T

L-II

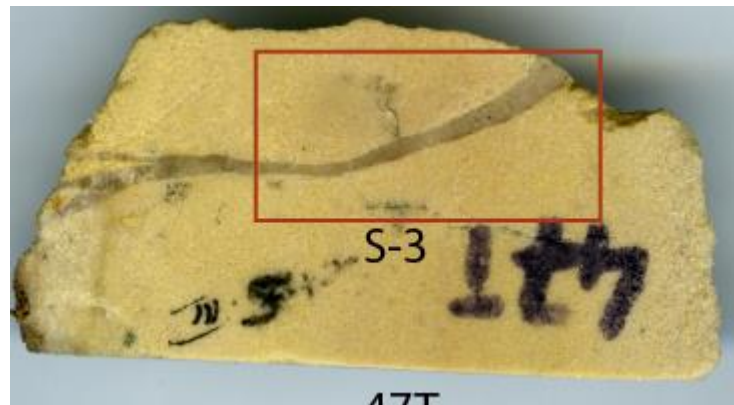

## References:

Coogan, L.A., Parrish, R.R. and Roberts, N.M., 2016, Early hydrothermal carbon uptake by the upper oceanic crust: Insight from in situ U-Pb dating: *Geology*, v. 44, p. 147-150.

Hill, C.A., Polyak, V.J., Asmerom, Y. and P. Provencio, P., 2016, Constraints on a Late Cretaceous uplift, denudation, and incision of the Grand Canyon region, southwestern Colorado Plateau, USA, from U-Pb dating of lacustrine limestone: *Tectonics*, v. 35, p. 896-906.

Li, Q., Parrish, R.R., Horstwood, M.S.A. and McArthur, J.M., 2014, U-Pb dating of cements in Mesozoic ammonites: *Chemical Geology*, v. 376, p. 76-83.

Roberts, N.M., Rasbury, E.T., Parrish, R.R., Smith, C.J., Horstwood, M.S. and Condon, D.J., 2017, A calcite reference material for LA-ICP-MS U-Pb geochronology: *Geochemistry, Geophysics, Geosystems*, v. 18, p.2807-2814.

Roberts, N.M., and Walker, R., J., 2016, U-Pb geochronology of calcite mineralized faults; absolute dating of rift-related fault events on the northeast Atlantic margin: *Geology*, v. 44, p. 531-534.

Spencer, C.J., Roberts, N.M., Cawood, P.A., Hawkesworth, C.J., Prave, A.R., Antonini, A.S. and Horstwood, M.S., 2014, Intermontane basins and bimodal volcanism at the onset of the Sveconorwegian Orogeny, southern Norway: *Precambrian Research*, v. 252, p. 107-118.

Woodhead, J.D. and Hergt, J.M., 2001, Strontium, neodymium and lead isotope analyses of NIST glass certified reference materials: SRM 610, 612, 614: *Geostandards Newsletter*, v. 25, p. 261-266.



| TABLE DR1 LOCATION OF SAMPLES, ORIENTATION OF VEINS AND U/Pb RESULTS |          |          |           |      |                   |          |             |             |              |      |       |       |
|----------------------------------------------------------------------|----------|----------|-----------|------|-------------------|----------|-------------|-------------|--------------|------|-------|-------|
| Sample name                                                          | Location |          |           | Set  | Vein orientation* |          | Formation   | U/Pb Dating |              |      |       |       |
|                                                                      | GPS#     | Lat (°N) | Long (°W) |      | Strike            | Slip-dir |             | Age (Ma)    | 2s prop (Ma) | MSWD | Y-Int | 2s    |
| <b><i>Eastern part of the basin</i></b>                              |          |          |           |      |                   |          |             |             |              |      |       |       |
| <u>Bighorn Mountain</u>                                              |          |          |           |      |                   |          |             |             |              |      |       |       |
| BM18                                                                 | 746      | 44.79347 | 107.9687  | S    | 82                | 81N      | Madison     | 59.5        | 2.7          | 2.5  | 0.590 | 0.012 |
| BH14                                                                 | 673      | 44.57419 | 107.7002  | L-I  | 55                | 81S      | Phosphoria  | 63.1        | 2.2          | 1.6  | 0.731 | 0.001 |
| BH6                                                                  | 673      | 44.57419 | 107.7002  | L-I  | 42                | 81W      | Phosphoria  | 59.6        | 2.4          | 3.5  | 0.820 | 0.006 |
| BH12                                                                 | 673      | 44.57419 | 107.7002  | L-I  | 51                | 89S      | Phosphoria  | 56.6        | 2.1          | 2.4  | 0.727 | 0.005 |
| BH11                                                                 | 673      | 44.57419 | 107.7002  | L-I  | 64                | 82S      | Phosphoria  | 53.5        | 1.8          | 2.0  | 0.729 | 0.006 |
| <u>Little Sheep Mountain and Sheep Mountain Anticlines</u>           |          |          |           |      |                   |          |             |             |              |      |       |       |
| LSM3                                                                 | 749      | 44.74589 | 108.1911  | S    | 125               | 16S      | Madison     | 75.3        | 2.8          | 3.2  | 0.725 | 0.002 |
| 24M                                                                  | 17       | 44.60951 | 108.1404  | S    | 116               | 80S      | Madison     | 2.43        | 0.22         | 5.1  | 0.617 | 0.007 |
| 21M A                                                                | 17       | 44.60587 | 108.1410  | L-I  | 53                | 86S      | Madison     | 72.0        | 3.0          | 3.6  | 0.658 | 0.010 |
| 21M C                                                                | 17       | 44.60587 | 108.1410  | L-I  | 53                | 86S      | Madison     | 65.5        | 2.9          | 3.0  | 0.617 | 0.027 |
| 24M B                                                                | 17       | 44.60951 | 108.1404  | L-I  | 46                | 80S      | Madison     | 1.75        | 0.58         | 52.0 | 0.684 | 0.015 |
| SMA1                                                                 | 17       | 44.60587 | 108.1410  | L-II | 135               | 85N      | Madison     | 45.4        | 1.8          | 1.9  | 0.729 | 0.002 |
| 20M                                                                  | 17       | 44.60587 | 108.1410  | L-II | 139               | 72N      | Madison     | 37.2        | 4.1          | 2.7  | 0.878 | 0.041 |
| 47T                                                                  | 39       | 44.61411 | 108.1401  | L-II | 131               | 72S      | Tensleep    | 5.56        | 0.49         | 7.4  | 0.643 | 0.014 |
| <b><i>Western part of the basin</i></b>                              |          |          |           |      |                   |          |             |             |              |      |       |       |
| <u>Rattlesnake Mountain</u>                                          |          |          |           |      |                   |          |             |             |              |      |       |       |
| R157                                                                 | 634      | 44.49737 | 109.1752  | S    | 97                | 81S      | Gros Ventre | 66.9        | 7.5          | 2.1  | 0.764 | 0.002 |
| R153                                                                 | 634      | 44.49737 | 109.1752  | S    | 94                | 90N      | Gros Ventre | 58.4        | 5.6          | 1.5  | 0.773 | 0.001 |
| R135A                                                                | 625      | 44.52832 | 109.2113  | S    | 131               | 58N      | Madison     | 89.7        | 2.9          | 4.8  | 0.606 | 0.013 |
| R135B                                                                | 625      | 44.52832 | 109.2113  | S    | 131               | 58N      | Madison     | 86.3        | 2.8          | 2.5  | 0.551 | 0.018 |
| R155                                                                 | 634      | 44.49737 | 109.1752  | S    | 113               | 73S      | Gros Ventre | 58.5        | 8.1          | 2.7  | 0.766 | 0.002 |
| R152                                                                 | 634      | 44.49737 | 109.1752  | S    | 113               | 74S      | Gros Ventre | 45.9        | 5.3          | 0.3  | 0.773 | 0.001 |
| R93                                                                  | 205      | 44.50137 | 109.1956  | L-I  | 52                | 87S      | Madison     | 34.4        | 4.1          | 5.5  | 0.892 | 0.024 |
| R17                                                                  | 126      | 44.50237 | 109.1869  | L-I  | 78                | 70N      | Madison     | 60.5        | 4.6          | 3.0  | 0.761 | 0.007 |
| R98                                                                  | 205      | 44.50142 | 109.1951  | L-I  | 48                | 87N      | Madison     | 53.7        | 3.1          | 2.5  | 0.799 | 0.008 |
| R84(a)                                                               | 145      | 44.50707 | 109.1159  | L-II | 148               | 83E      | Phosphoria  | 14.5        | 0.7          | 10.5 | 0.636 | 0.009 |
| R84(b)                                                               | 145      | 44.50707 | 109.1159  | L-II | 148               | 83E      | Phosphoria  | 27.9        | 1.1          | 3.2  | 0.646 | 0.008 |
| * corrected from host bedding orientation                            |          |          |           |      |                   |          |             |             |              |      |       |       |

Table DR2: Details of the LA-ICP-MS analysis
